# Supplementary material
Source: HighWire-hosted journal article supplement (https://annals.highwire.org/content/suppl/2004/02/12/137.4.225)
Supplement: 137-4-225-AppendixFigure.pdf [file 137-4-225-AppendixFigure.pdf]

## Influenza Survey

Influenza, or the flu, is an acute respiratory illness that typically occurs during the winter. Symptoms include fever, headache, and general weakness. The average duration of the flu is 5 days.

Imagine it is in the middle of flu season and you have come down with the flu. There are several treatments available (taken by mouth in either pill or syrup form) that can usually reduce the flu duration by 1 or 2 days (the average duration of the flu is 5 days). You can take over-the-counter medication for minor flu symptom relief (aspirin, Tylenol, etc.), whether or not you choose to take the treatments to reduce flu duration.

In order to take the oral medication to reduce flu duration, you have to personally pay for this treatment. There are side effects for some of the medications (nausea or dizziness, nervousness, and anxiety).

For each medication, the total amount of days of symptoms is different (some may completely relieve all remaining days of the flu while others may only give one day of relief).

In each of the following categories, please indicate your likelihood of choosing to take the oral medication if the amount of money spent, the side effects, and the number of days of symptoms **relieved** are as indicated (if there is a side effect indicated, assume you will definitely experience that side effect with the medication). You may assume that, in choosing to take the medication, you must spend about **1 hour** to obtain it.

### Best Case

Scenario #1 is the best case for the medication. The medication would relieve all the days of flu, it is free, and there are no side effects.

|                      |       |             |
|----------------------|-------|-------------|
| Days of Flu Relieved | Price | Side Effect |
| #1 5 days relieved   | Free  | None        |

On a scale of 0 to 10, please circle the **NUMBER** at the **right** indicating how likely you are to take the medication.

|                               |      |      |
|-------------------------------|------|------|
| Won't                         | Toss | Will |
| Take                          | Up   | Take |
| <b>0 1 2 3 4 5 6 7 8 9 10</b> |      |      |

### Worst Case

Scenario #2 is the worst case for the medication. The medication relieves only 1 day of flu (you are sick with the flu for 4 days), it costs \$50, and you experience dizziness, nervousness, and anxiety.

|                      |       |                                 |
|----------------------|-------|---------------------------------|
| Days of Flu Relieved | Price | Side Effect                     |
| #2 1 day relieved    | \$50  | Dizziness, nervousness, anxiety |

On a scale of 0 to 10, please circle the **NUMBER** at the **right** indicating how likely you are to take the medication.

|                               |      |      |
|-------------------------------|------|------|
| Won't                         | Toss | Will |
| Take                          | Up   | Take |
| <b>0 1 2 3 4 5 6 7 8 9 10</b> |      |      |

### Other Cases

The following page contains additional scenarios. Note that none of the following scenarios are better than the previous best-case scenario or worse than the previous worst-case scenario. The number you circle should fall **in between** those of your previous answers.

|                      |       |                                 |
|----------------------|-------|---------------------------------|
| Days of Flu Relieved | Price | Side Effect                     |
| #3 5 days relieved   | \$10  | Dizziness, nervousness, anxiety |

On a scale of 0 to 10, please circle the **NUMBER** at the **right** indicating how likely you are to take the medication.

|                               |      |      |
|-------------------------------|------|------|
| Won't                         | Toss | Will |
| Take                          | Up   | Take |
| <b>0 1 2 3 4 5 6 7 8 9 10</b> |      |      |

|                      |       |                                 |
|----------------------|-------|---------------------------------|
| Days of Flu Relieved | Price | Side Effect                     |
| #4 2 days relieved   | Free  | Dizziness, nervousness, anxiety |

On a scale of 0 to 10, please circle the **NUMBER** at the **right** indicating how likely you are to take the medication.

|                               |      |      |
|-------------------------------|------|------|
| Won't                         | Toss | Will |
| Take                          | Up   | Take |
| <b>0 1 2 3 4 5 6 7 8 9 10</b> |      |      |

|                      |       |             |
|----------------------|-------|-------------|
| Days of Flu Relieved | Price | Side Effect |
| #5 1 day relieved    | Free  | Nausea      |

On a scale of 0 to 10, please circle the **NUMBER** at the **right** indicating how likely you are to take the medication.

|                               |      |      |
|-------------------------------|------|------|
| Won't                         | Toss | Will |
| Take                          | Up   | Take |
| <b>0 1 2 3 4 5 6 7 8 9 10</b> |      |      |

Days of Flu Relieved      Price      Side Effect  
#6 5 days relieved      \$50      Nausea

On a scale of 0 to 10, please circle the **NUMBER**  
at the **right** indicating how likely you are to take  
the medication.

Won't      Toss      Will  
Take      Up      Take  
**0 1 2 3 4 5 6 7 8 9 10**

Days of Flu Relieved      Price      Side Effect  
#7 2 days relieved      \$10      Nausea

On a scale of 0 to 10, please circle the **NUMBER**  
at the **right** indicating how likely you are to take  
the medication.

Won't      Toss      Will  
Take      Up      Take  
**0 1 2 3 4 5 6 7 8 9 10**

Days of Flu Relieved      Price      Side Effect  
#8 1 day relieved      \$10      None

On a scale of 0 to 10, please circle the **NUMBER**  
at the **right** indicating how likely you are to take  
the medication.

Won't      Toss      Will  
Take      Up      Take  
**0 1 2 3 4 5 6 7 8 9 10**

Days of Flu Relieved      Price      Side Effect  
#9 2 days relieved      \$50      None

On a scale of 0 to 10, please circle the **NUMBER**  
at the **right** indicating how likely you are to take  
the medication.

Won't      Toss      Will  
Take      Up      Take  
**0 1 2 3 4 5 6 7 8 9 10**
